# Supplementary material for: The lncRNA XIST interacts with miR-140/miR-124/iASPP axis to promote pancreatic carcinoma growth
Source: Oncotarget. 2017 Nov 20;8(69):113701–18. doi: 10.18632/oncotarget.22555 (PMC5768357; doi:10.18632/oncotarget.22555)
Supplement: Supplementary file 1 [file oncotarget-08-113701-s001.pdf]

## **The lncRNA XIST interacts with miR-140/miR-124/iASPP axis to promote pancreatic carcinoma growth**

### **SUPPLEMENTARY MATERIALS**

#### **Supplementary Table 1: Sequences used in the present study**

See Supplementary File 1
